# Supplementary material for: TE-array—a high throughput tool to study transposon transcription
Source: PubMed Central journal article supplement (PMC3878892; doi:10.1186/1471-2164-14-869), 2013-12-10

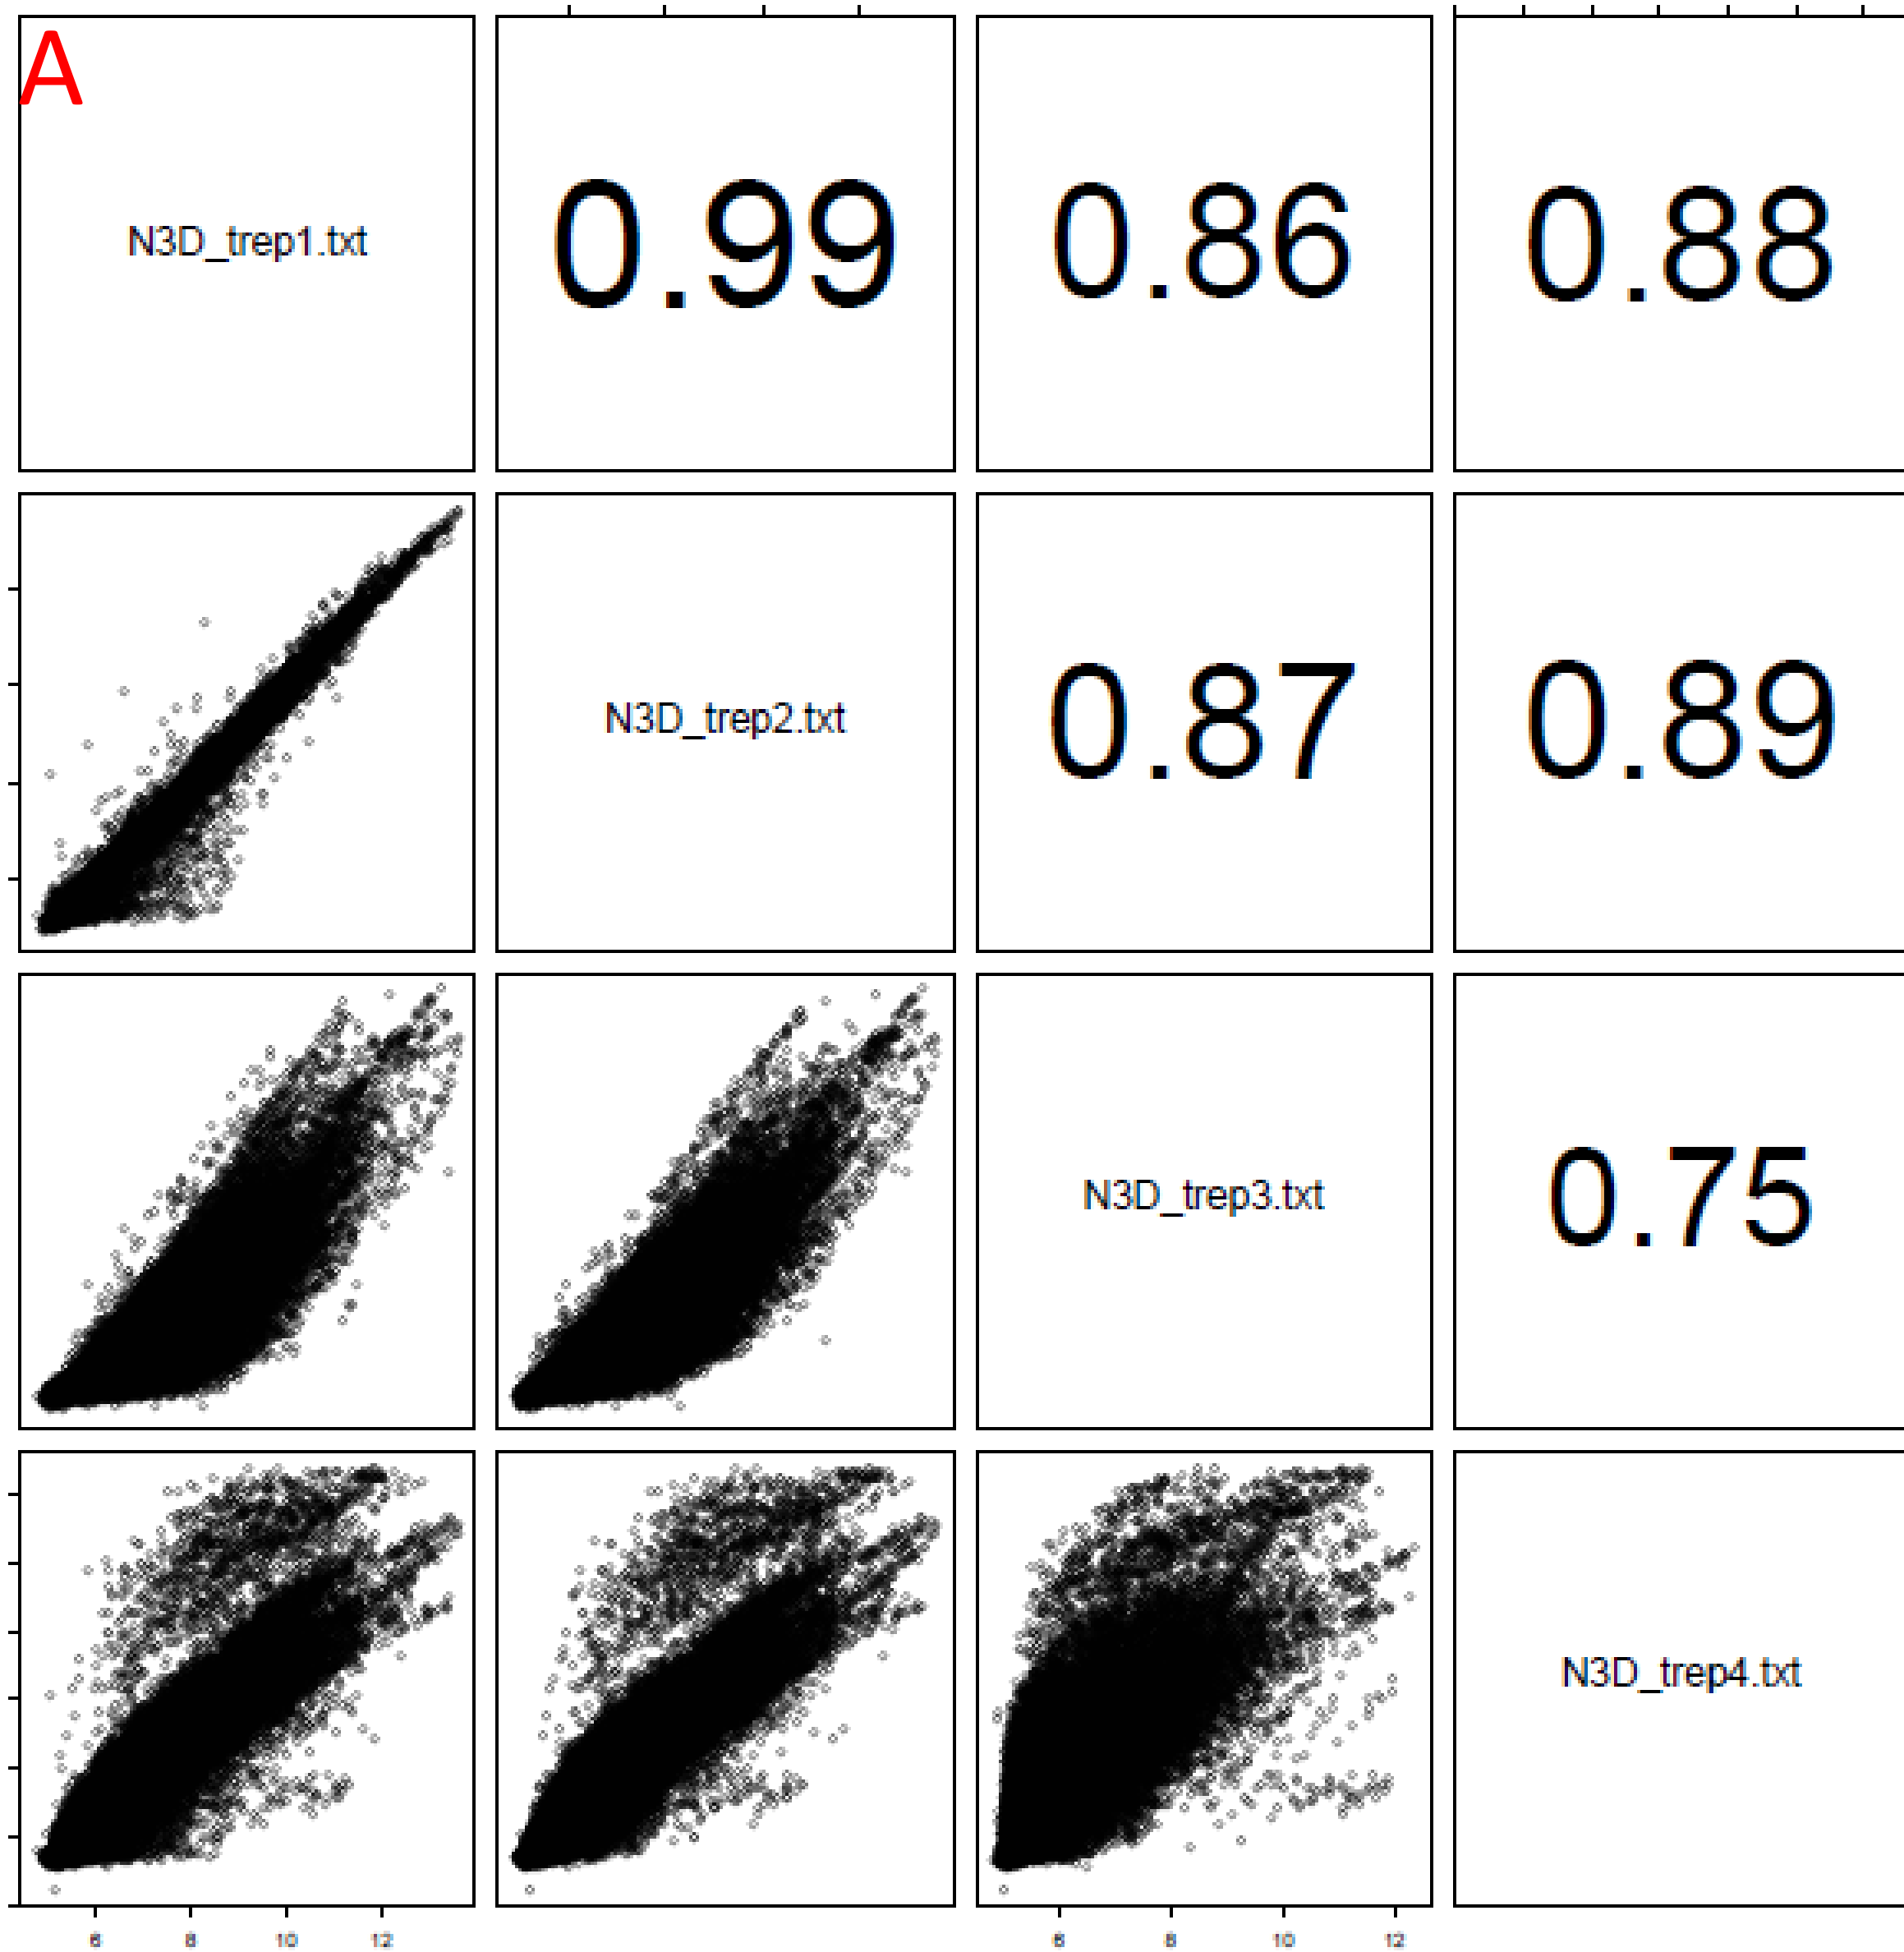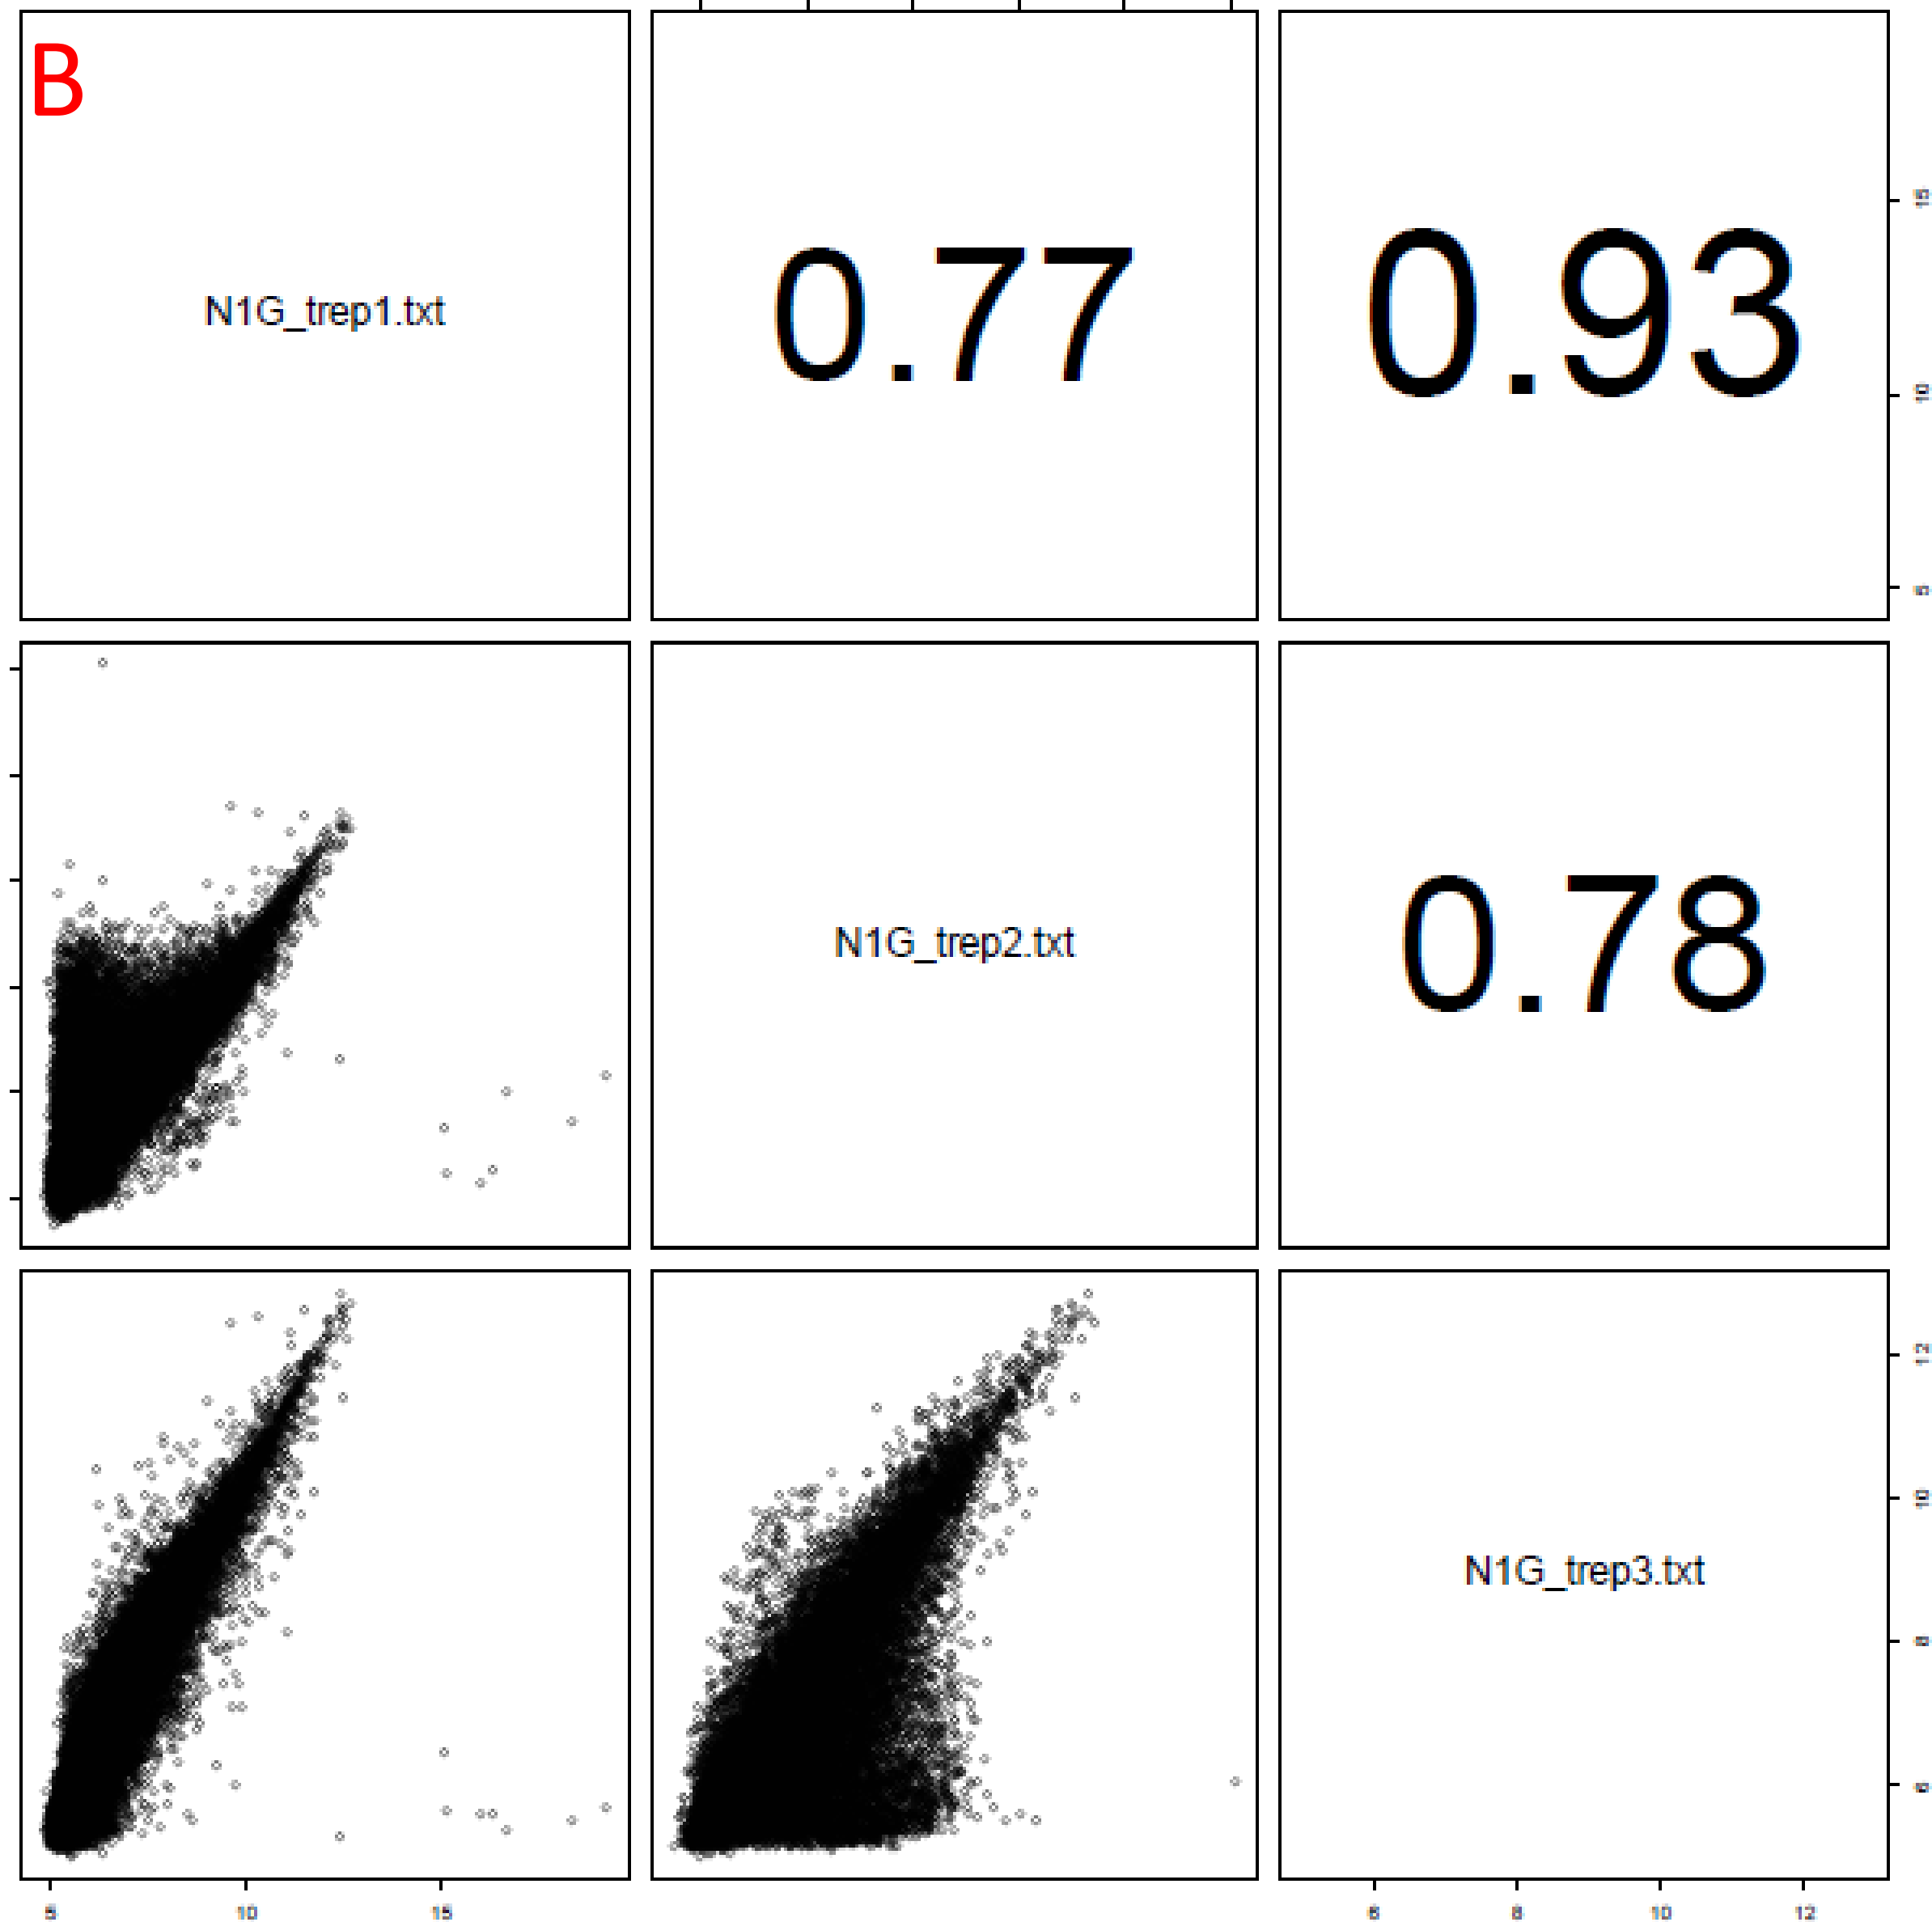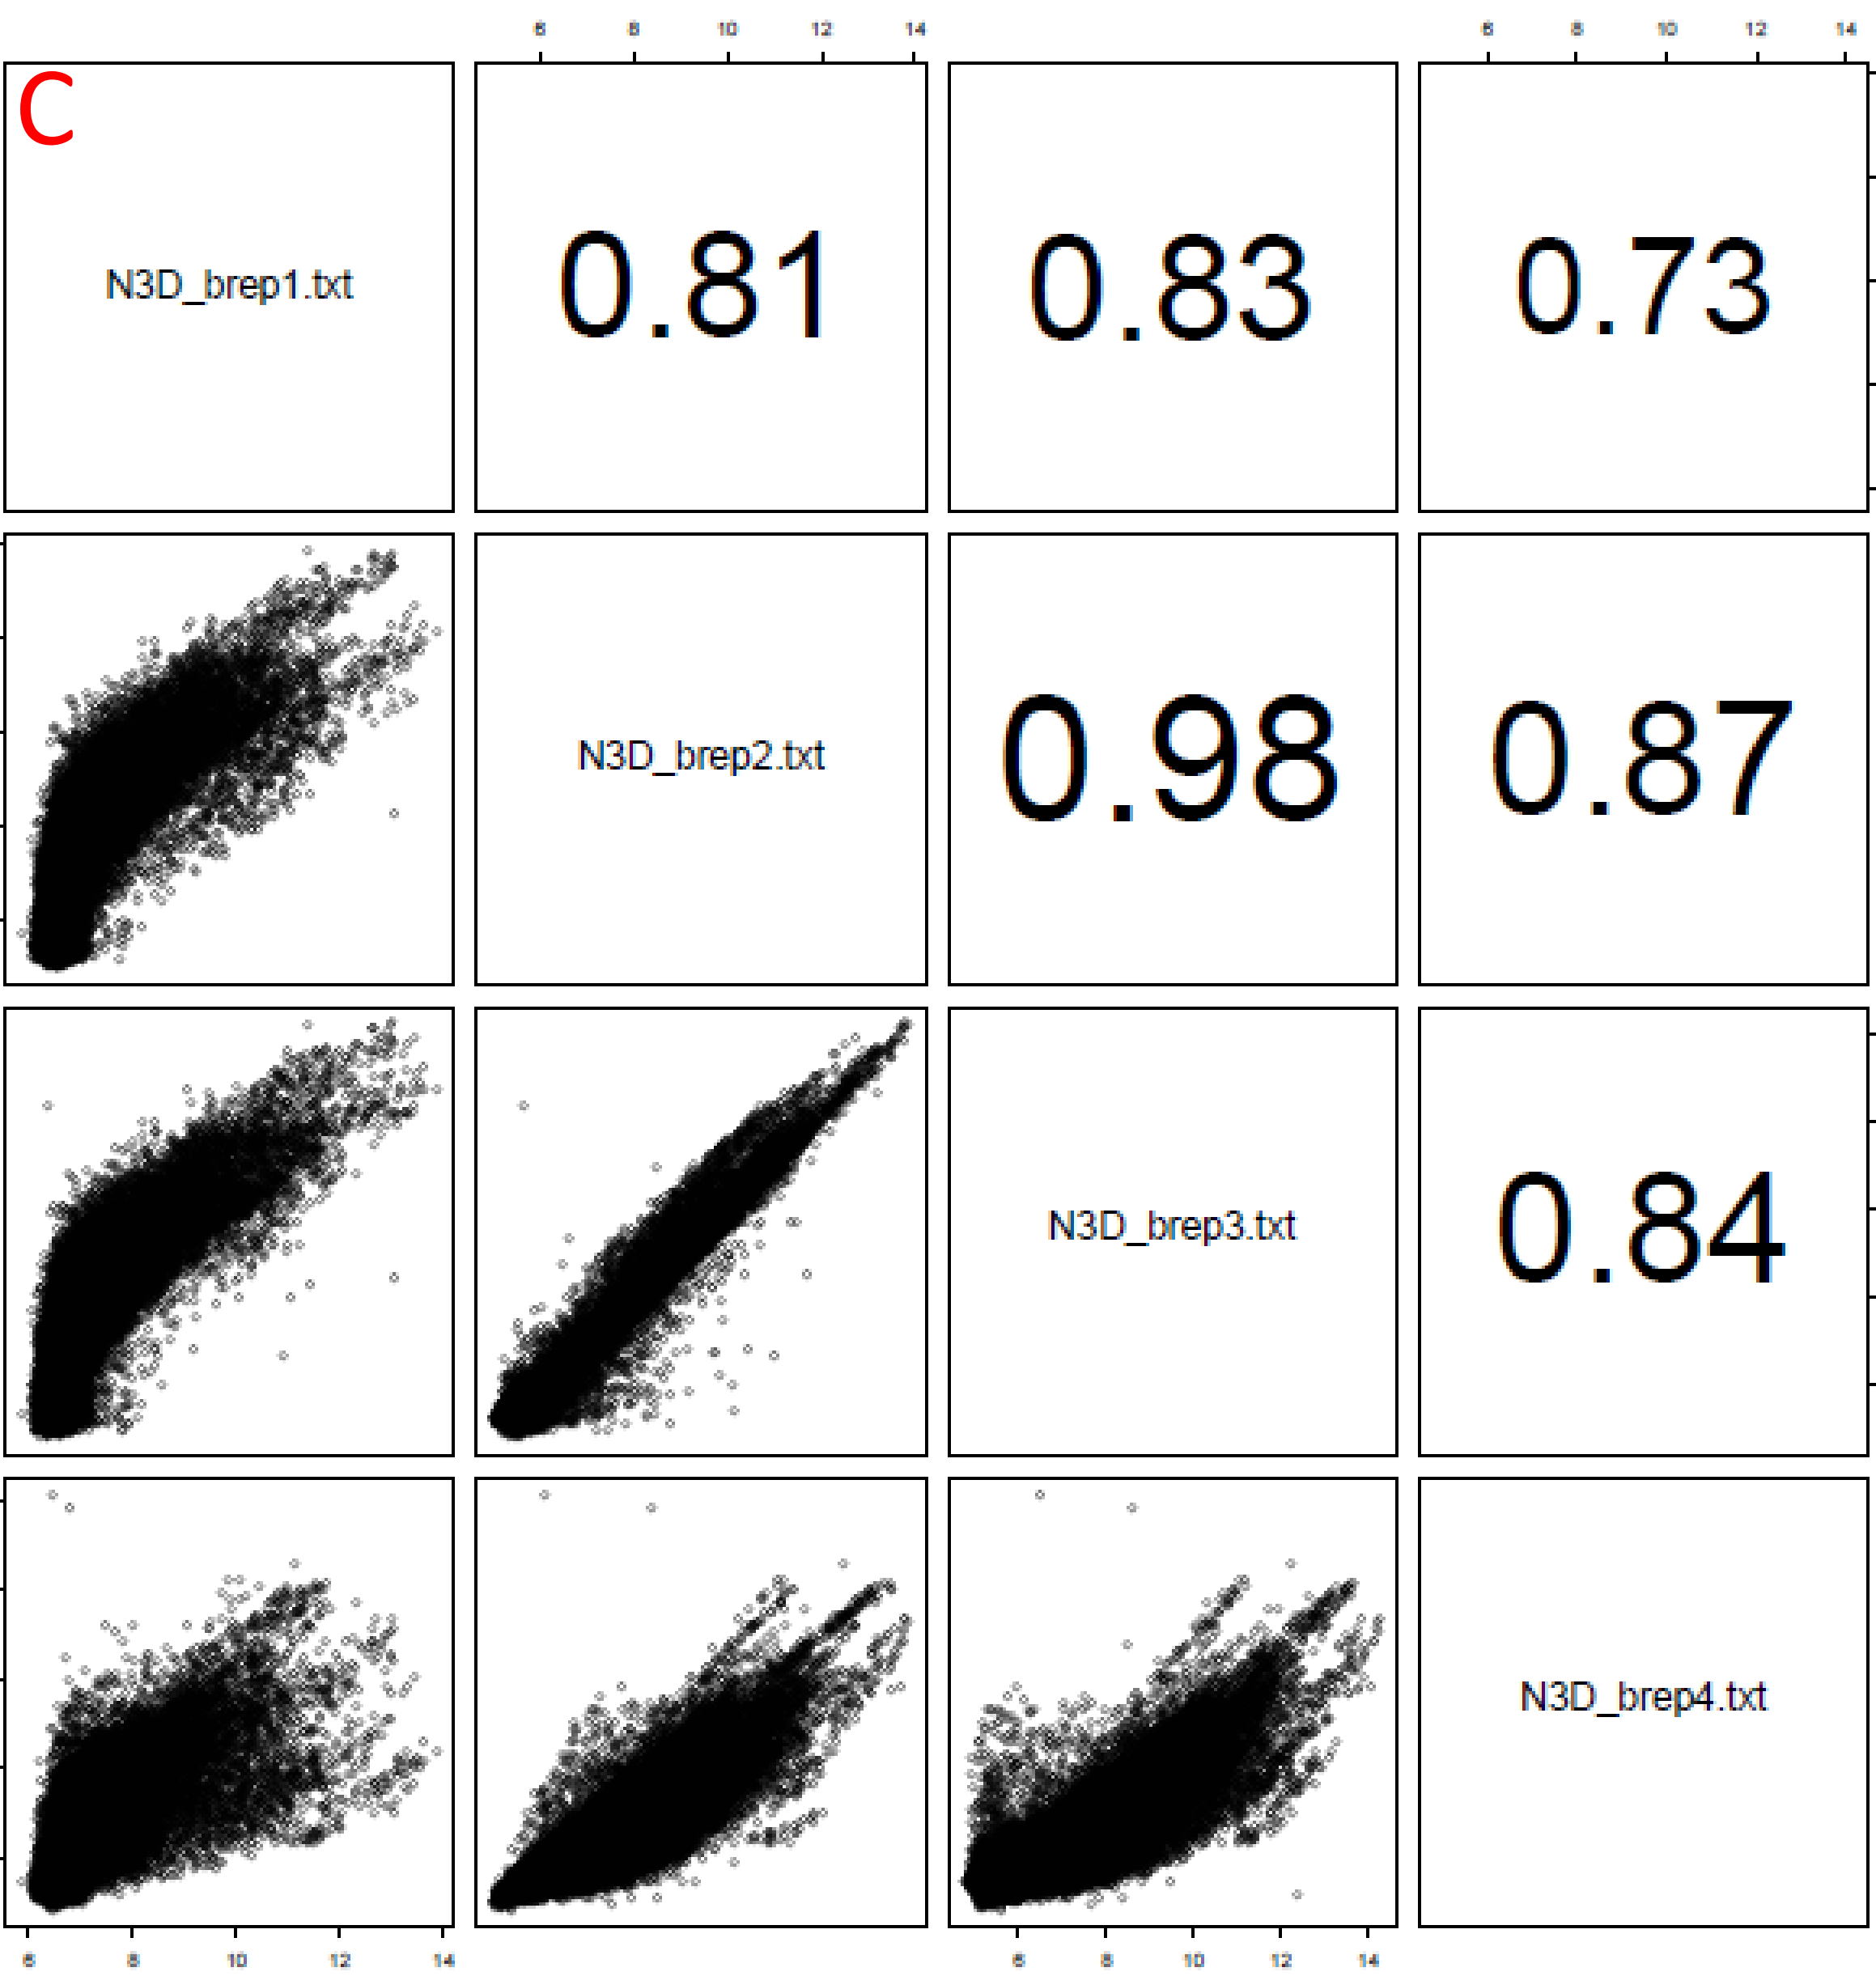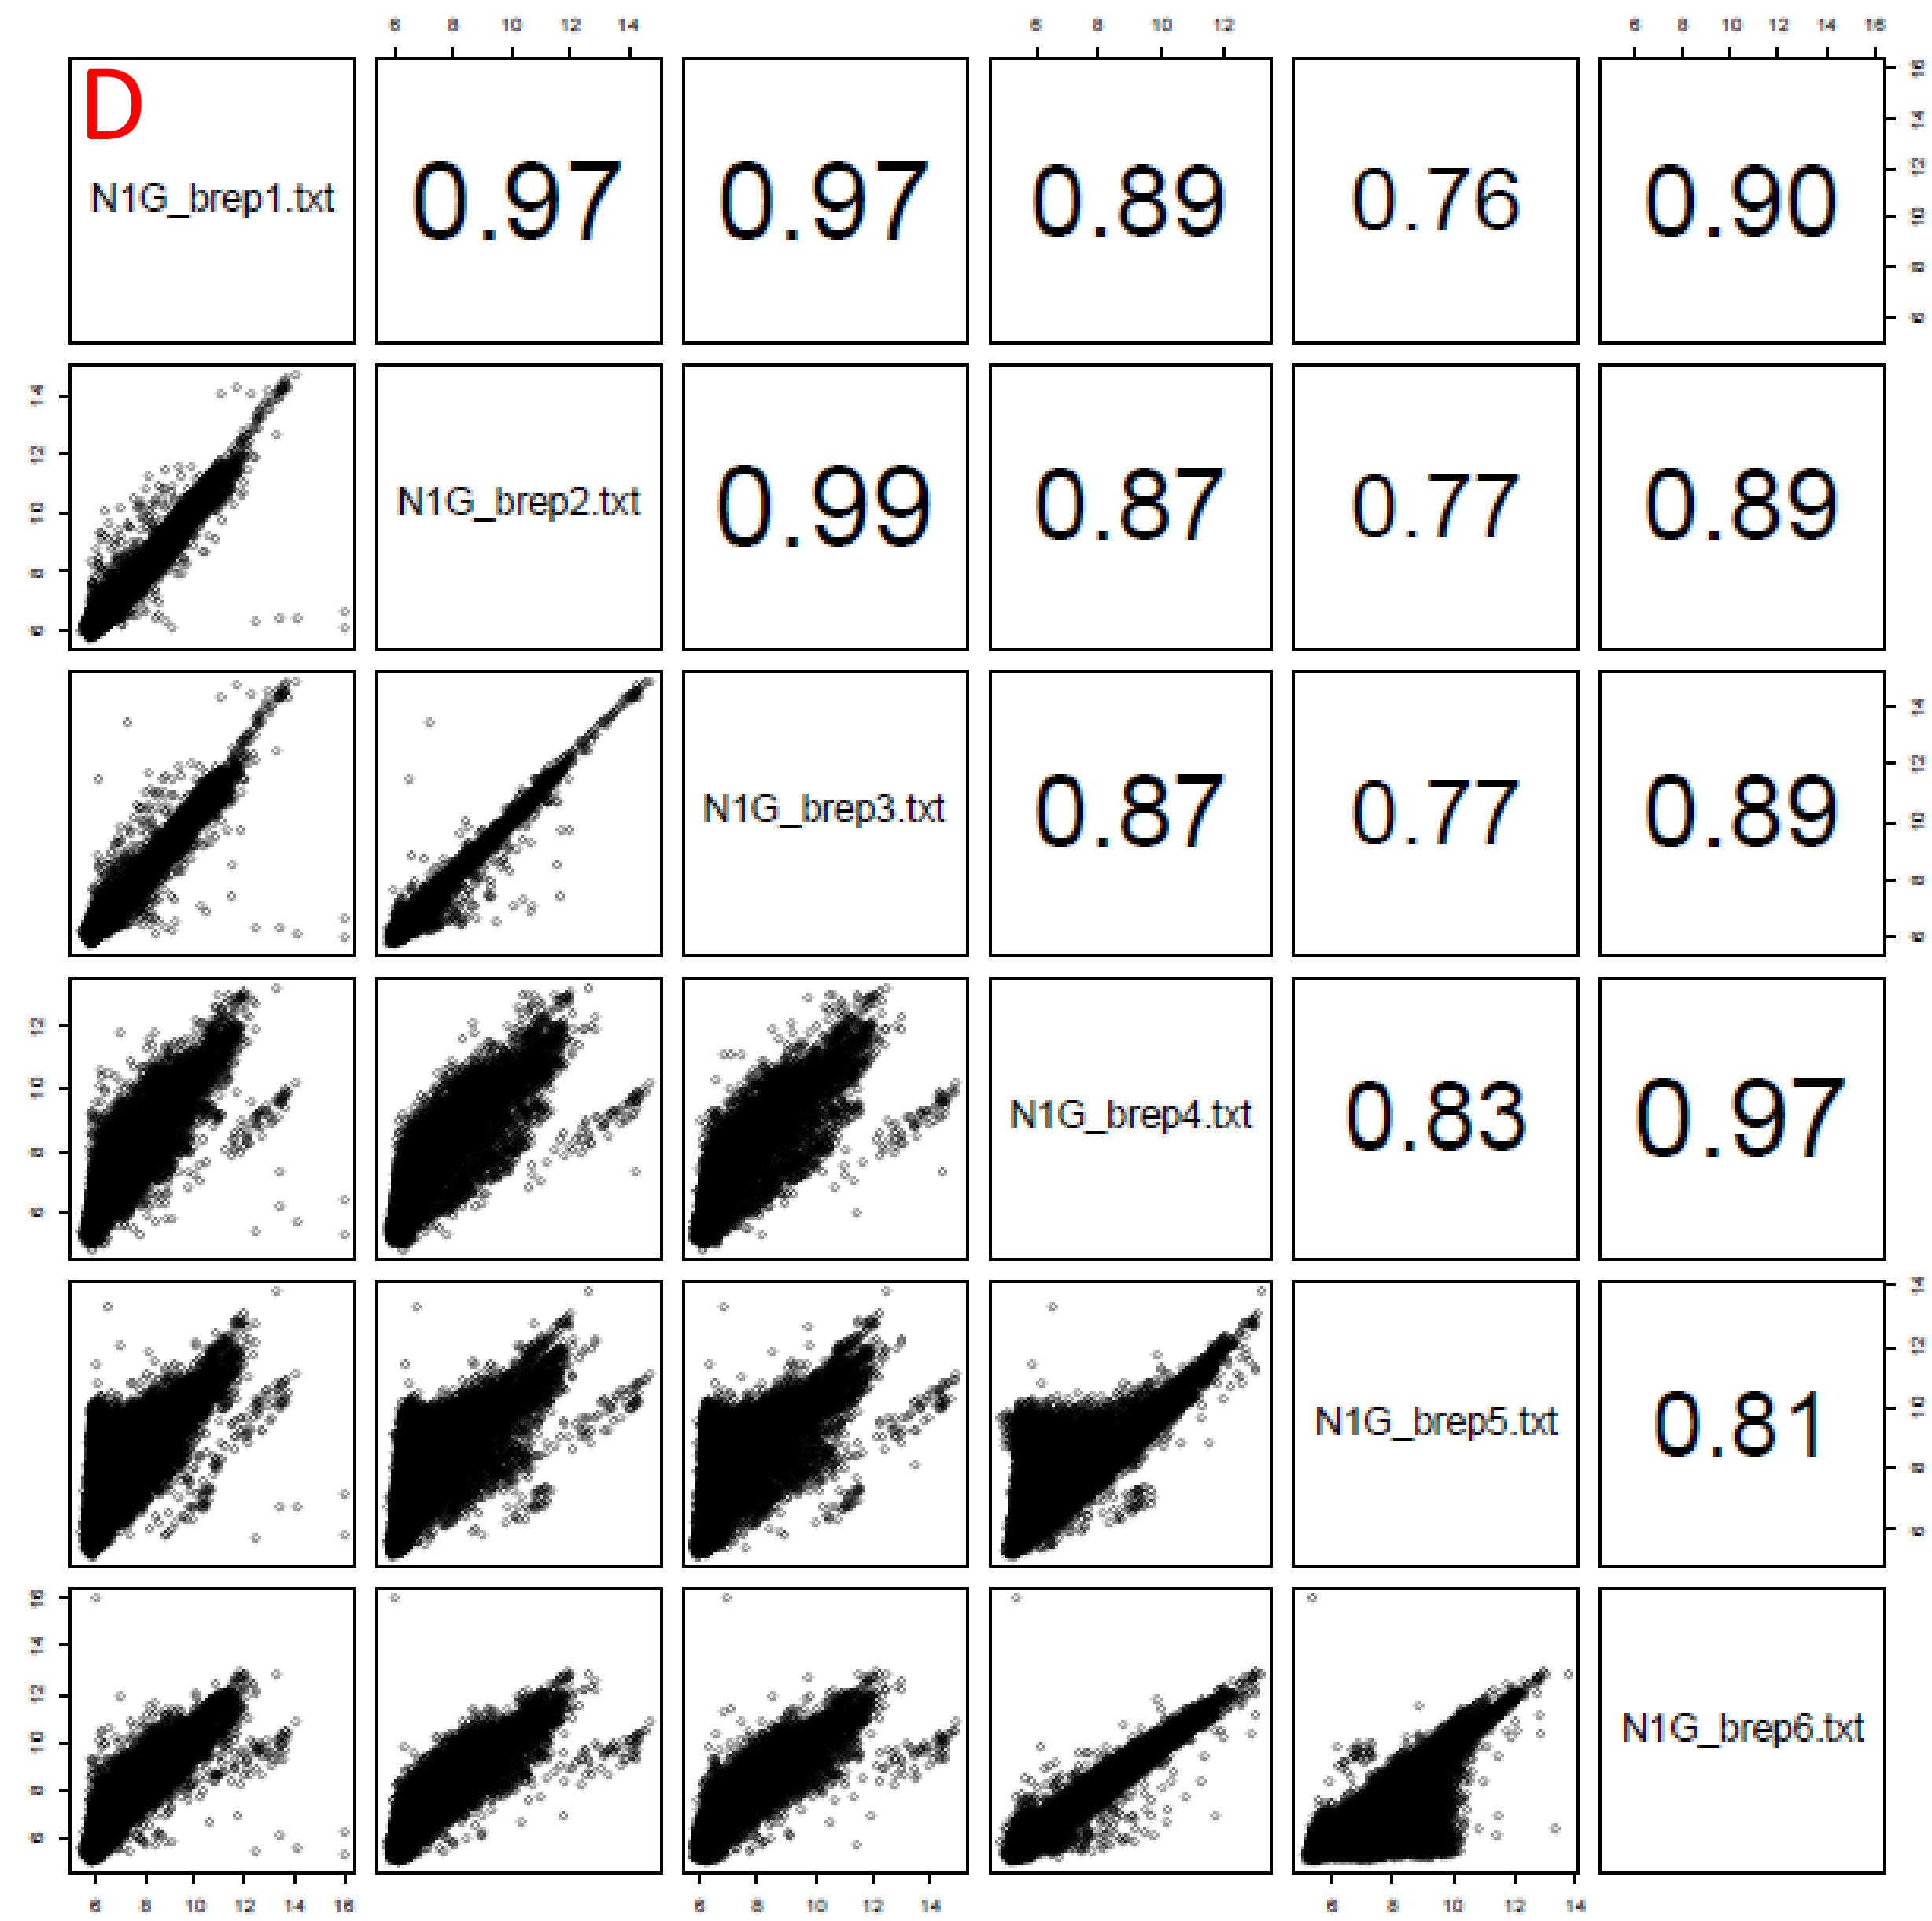

Supplement: 1471-2164-14-869-S2.pdf [file 1471-2164-14-869-S2.pdf]
